# Supplementary material
Source: Springer Nature journal article supplement (https://www.springermedizin.de/resource/supplementary/12883_2013_929_MOESM1_ESM.pdf/9456178)

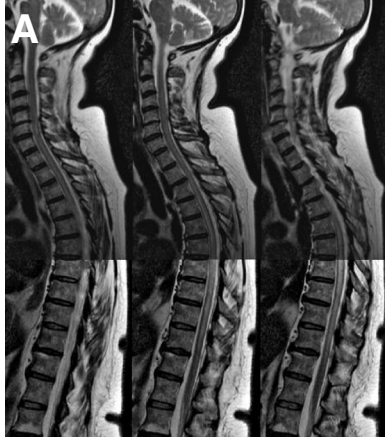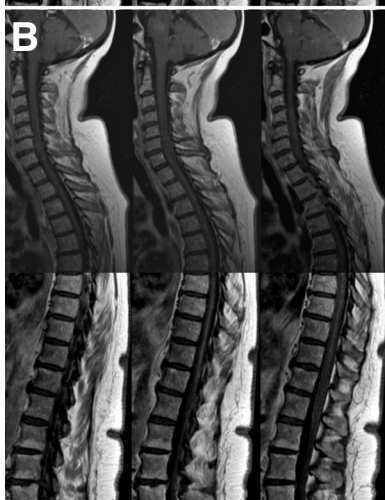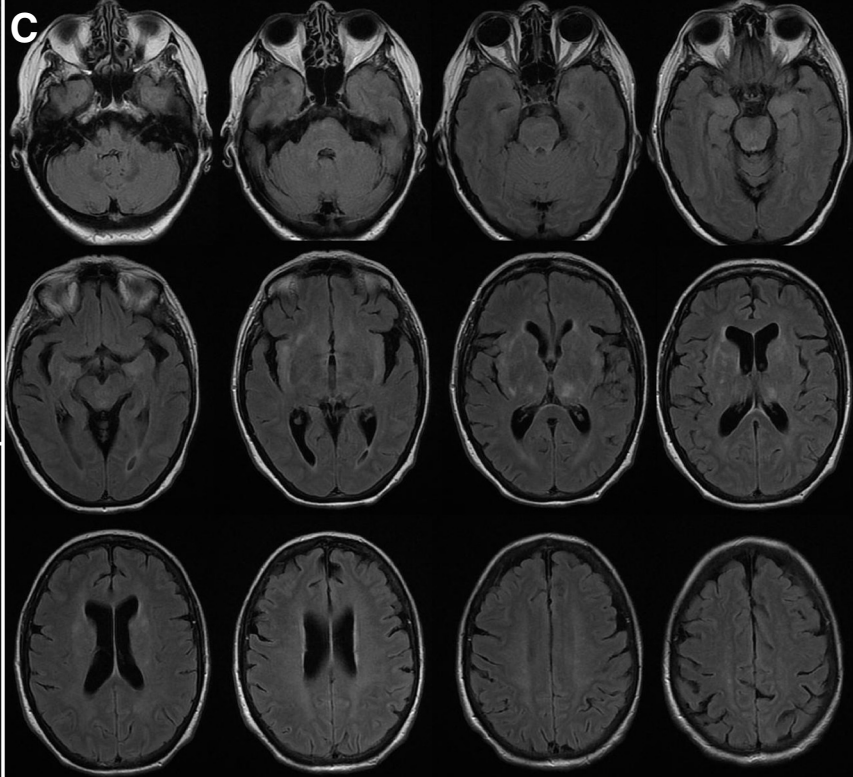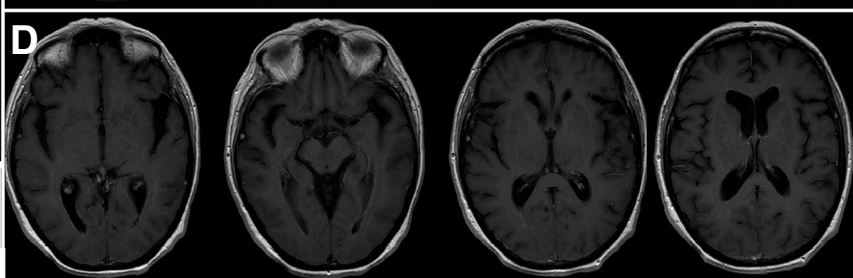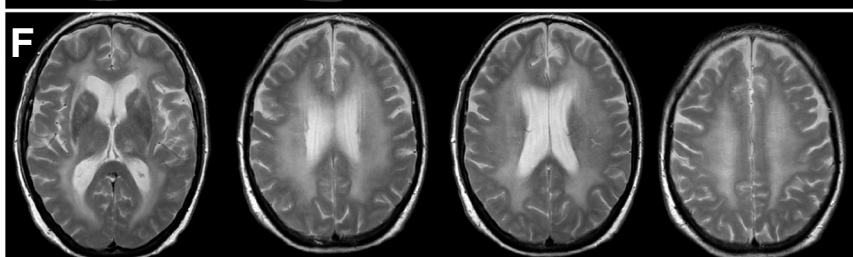

**E**

|                        | OD         | OS         |
|------------------------|------------|------------|
| Average RNFL Thickness | 86 $\mu$ m | 97 $\mu$ m |
| RNFL Symmetry          | 78%        |            |

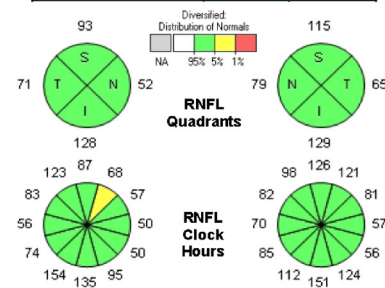

Supplement: MOESM1 [file 9456178]
